# Supplementary material
Source: Springer Nature journal article supplement (https://www.springermedizin.de/resource/supplementary/12891_2012_1698_MOESM2_ESM.pdf/9508404)
Supplement: MOESM2 [file 9508404]

Women without type 2 diabetes  
interested in participating in study  
n= 34

Excluded due to:  
use of osteoporosis-  
related medication (n= 4)

Completed baseline assessment  
n= 30  
**Valid MRI scans for analysis  
n= 25**

Withdrawn from study due  
to illness (n= 2 )  
Lost-to-followup  
(n= 1)

Completed follow-up assessment  
n= 22  
**Valid MRI scans for analysis  
n=21**

Women with type 2 diabetes  
interested in participating in study  
n= 47

Excluded due to:  
use of osteoporosis-related  
medication (n= 11)  
diagnosis of type 2 diabetes  
<5 years (n= 3)  
contraindication to MRI scan  
(n= 2)

Withdrawn from study prior to  
study visit (n= 1)

Completed baseline assessment  
n= 30  
**Valid MRI scans for analysis  
n= 29**

Withdrawn from study due to  
illness (n= 7)  
Withdrawn from study due to  
lack of time (n= 3)  
Lost-to-followup  
(n= 3)  
Death (n= 1)

Completed follow-up assessment  
n= 15  
**Valid MRI scans for analysis  
n= 14**
